# Supplementary material for: Development of a molecularly imprinted electrochemical sensor based on (Cu-BTC)-MOF and graphene composite for highly sensitive and selective chloramphenicol detection
Source: Royal Society of Chemistry journal article supplement (doi:10.1039/d5ra10071b), 2026-04-02
Supplement: d5ra10071b1.pdf [file d5ra10071b1.pdf]

## Supplementary Information for Analyst

This journal is © The Royal Society of Chemistry 2025

### **Development of a molecularly imprinted electrochemical sensor based on (Cu-BTC)-MOF and graphene composite for highly sensitive and selective chloramphenicol detection**

**Ni Xiang, Suijian Qi, Jinhua Piao\***

*School of Food Science and Engineering, South China University of Technology,  
Guangzhou 510641, China*

\* Corresponding author. Tel: 86-20-87113849; Fax: 86-20-87113849.  
E-mail address: jhpiao@scut.edu.cn (J. Piao)

## Table of contents

|                                                                                                                                                                                                                                                                                                                        |    |
|------------------------------------------------------------------------------------------------------------------------------------------------------------------------------------------------------------------------------------------------------------------------------------------------------------------------|----|
| <b>Supplementary information</b> .....                                                                                                                                                                                                                                                                                 | S3 |
| Scheme S1. Schematic illustration of the synthesis process of (Cu-BTC)-MOF.....                                                                                                                                                                                                                                        | S3 |
| Scheme S2 Schematic illustration of the prepared process of MIP/(Cu-BTC)-MOF/Gr/GCE sensor.....                                                                                                                                                                                                                        | S3 |
| Fig. S1 SEM images of as-prepared materials: (a) (Cu-BTC)-MOF, (b) (Cu-BTC)-MOF/Gr-1, (c) (Cu-BTC)-MOF/Gr-2, (d) (Cu-BTC)-MOF/Gr-3, (e) (Cu-BTC)-MOF/Gr-4, (f) (Cu-BTC)-MOF/Gr-5.....                                                                                                                                  | S4 |
| Fig. S2 Electrochemical properties of different modified electrodes: (a) CV curves, (b) Nyquist plots.....                                                                                                                                                                                                             | S5 |
| Fig. S3 (a) CVs of the MIP/(Cu-BTC)-MOF/Gr/GCE sensor measured in the 0.1 M PBS solution (pH 7.0) in a PBS (pH 7.0) buffer solution containing the $[\text{Fe}(\text{CN})_6]^{3-/4-}$ redox pair at scan rates range 25-200 $\text{mV s}^{-1}$ , (b) Plots of the peak currents vs. the square root of scan rates..... | S5 |
| Fig. S4 Effect of the constructed parameters on the performance of MIP/(Cu-BTC)-MOF/Gr/GCE sensor.....                                                                                                                                                                                                                 | S6 |
| Fig. S5 Stability of the MIP/(Cu-BTC)-MOF/Gr/GCE sensor: (a) stability, (b) Long-term stability.....                                                                                                                                                                                                                   | S7 |
| Table S1. The CV peak current for different modified electrodes.....                                                                                                                                                                                                                                                   | S7 |
| Table S2 Calculated results of $R_{ct}$ for different modified electrodes.....                                                                                                                                                                                                                                         | S8 |

## Supplementary information

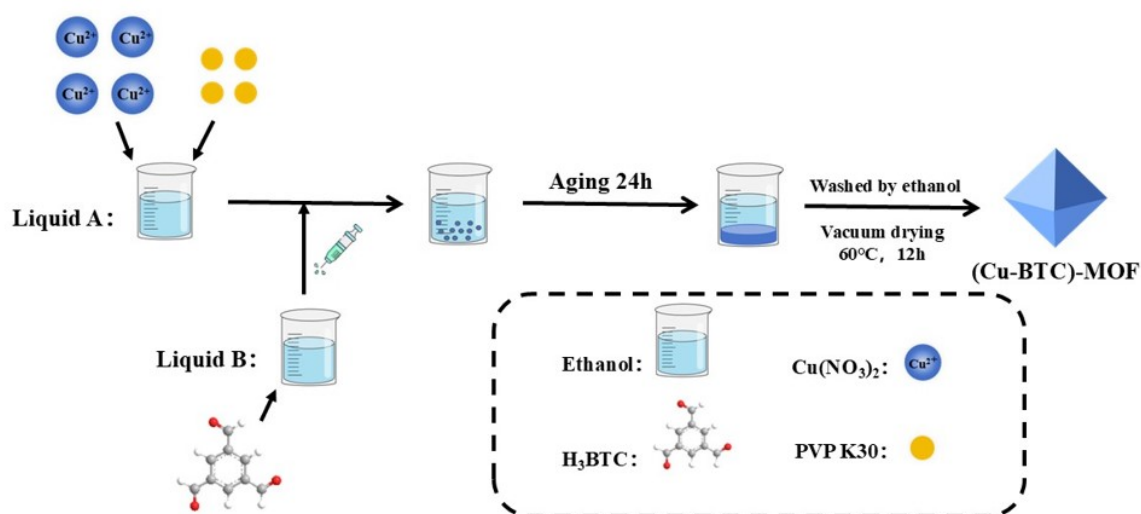

Scheme S1. Schematic illustration of the synthesis process of (Cu-BTC)-MOF.

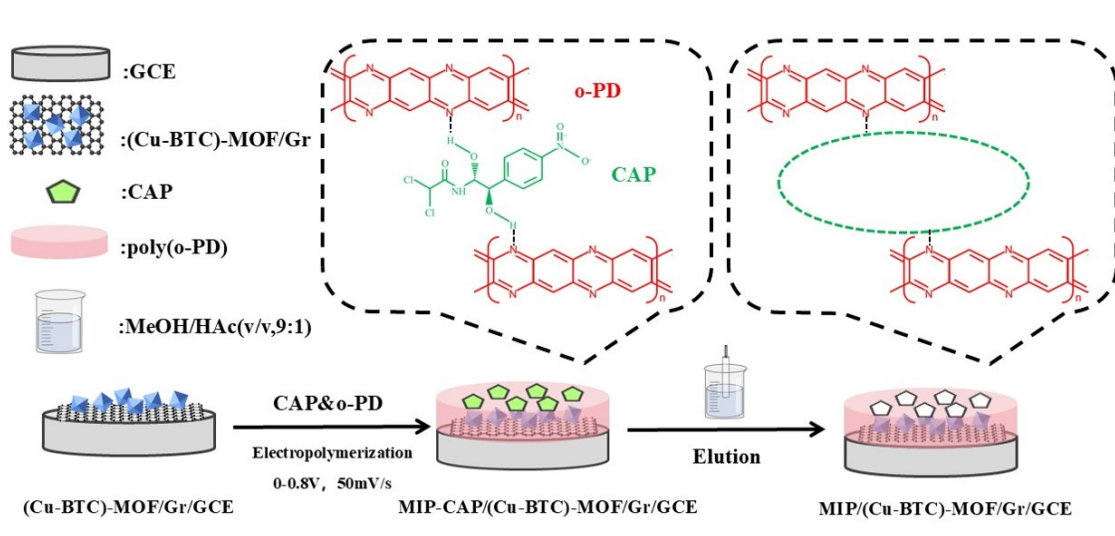

Scheme S2. Schematic illustration of the prepared process of MIP/(Cu-BTC)-MOF/Gr/GCE sensor.

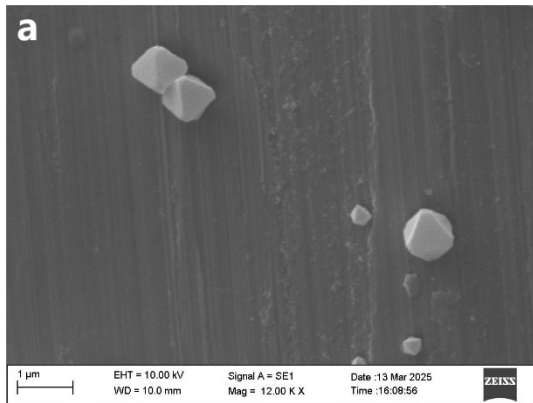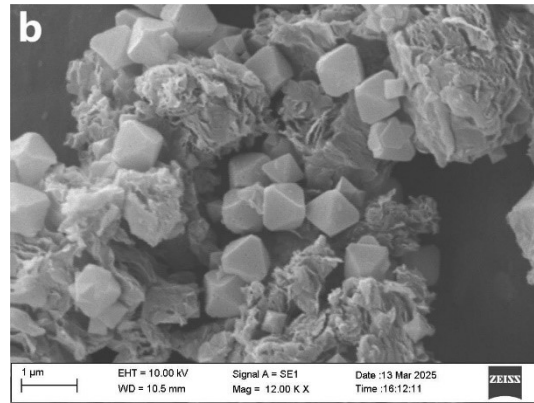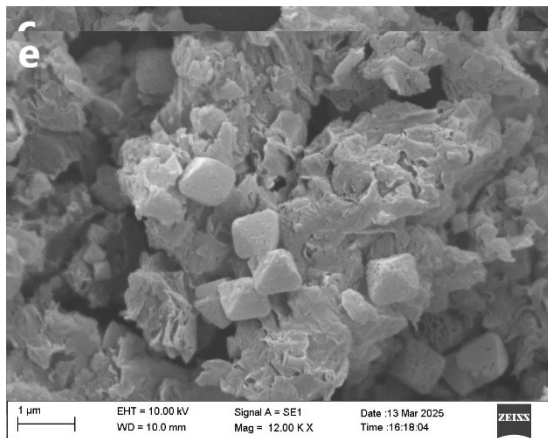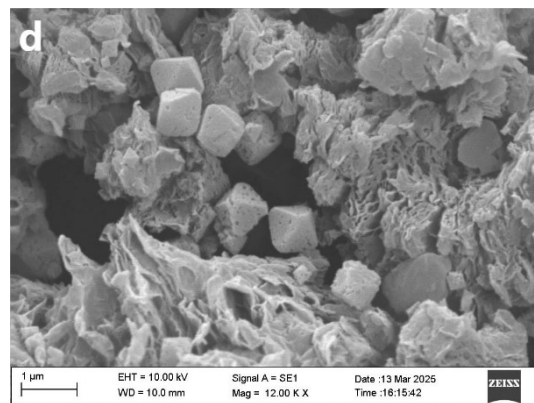

**Fig. S1** SEM images of as-prepared materials: (a) (Cu-BTC)-MOF, (b) (Cu-BTC)-MOF/Gr-1, (c) (Cu-BTC)-MOF/Gr-2, (d) (Cu-BTC)-MOF/Gr-3, (e) (Cu-BTC)-MOF/Gr-4, (f) (Cu-BTC)-MOF/Gr-5.

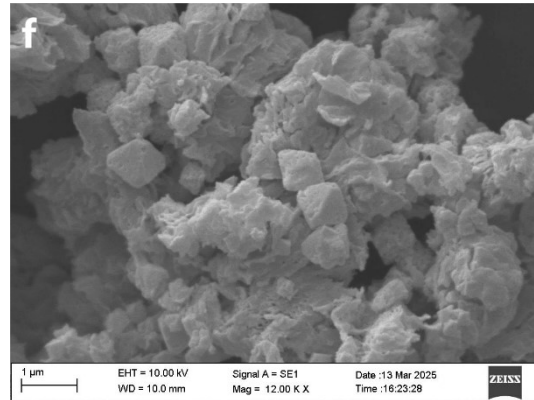

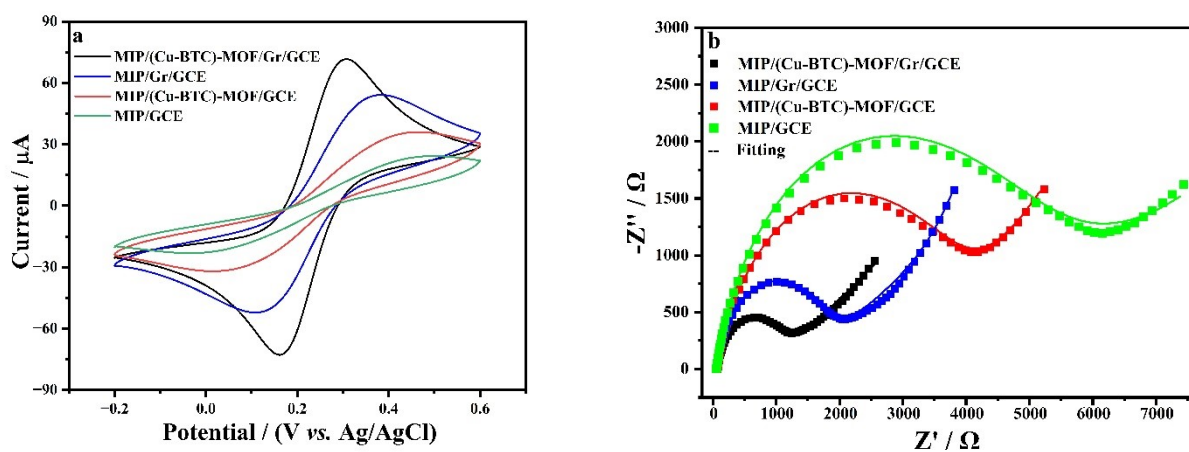

**Fig. S2** Electrochemical properties of different modified electrodes: (a) CV curves, (b) Nyquist plots

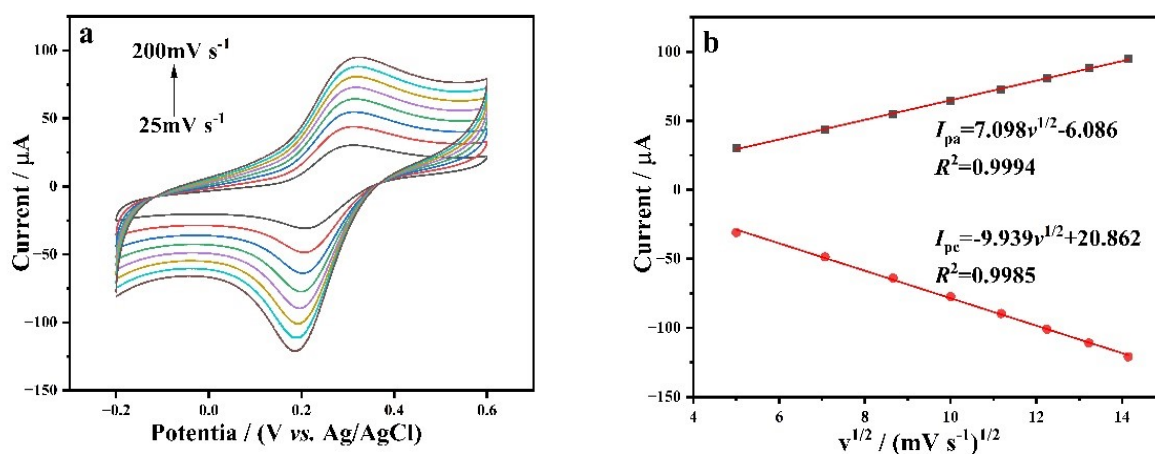

**Fig. S3** (a) CVs of the MIP/(Cu-BTC)-MOF/Gr/GCE sensor measured in the 0.1 M PBS solution (pH 7.0) in a PBS (pH 7.0) buffer solution containing the  $[\text{Fe}(\text{CN})_6]^{3-/4-}$  redox pair at scan rates range 25-200  $\text{mV s}^{-1}$ , (b) Plots of the peak currents vs. the square root of scan rates.

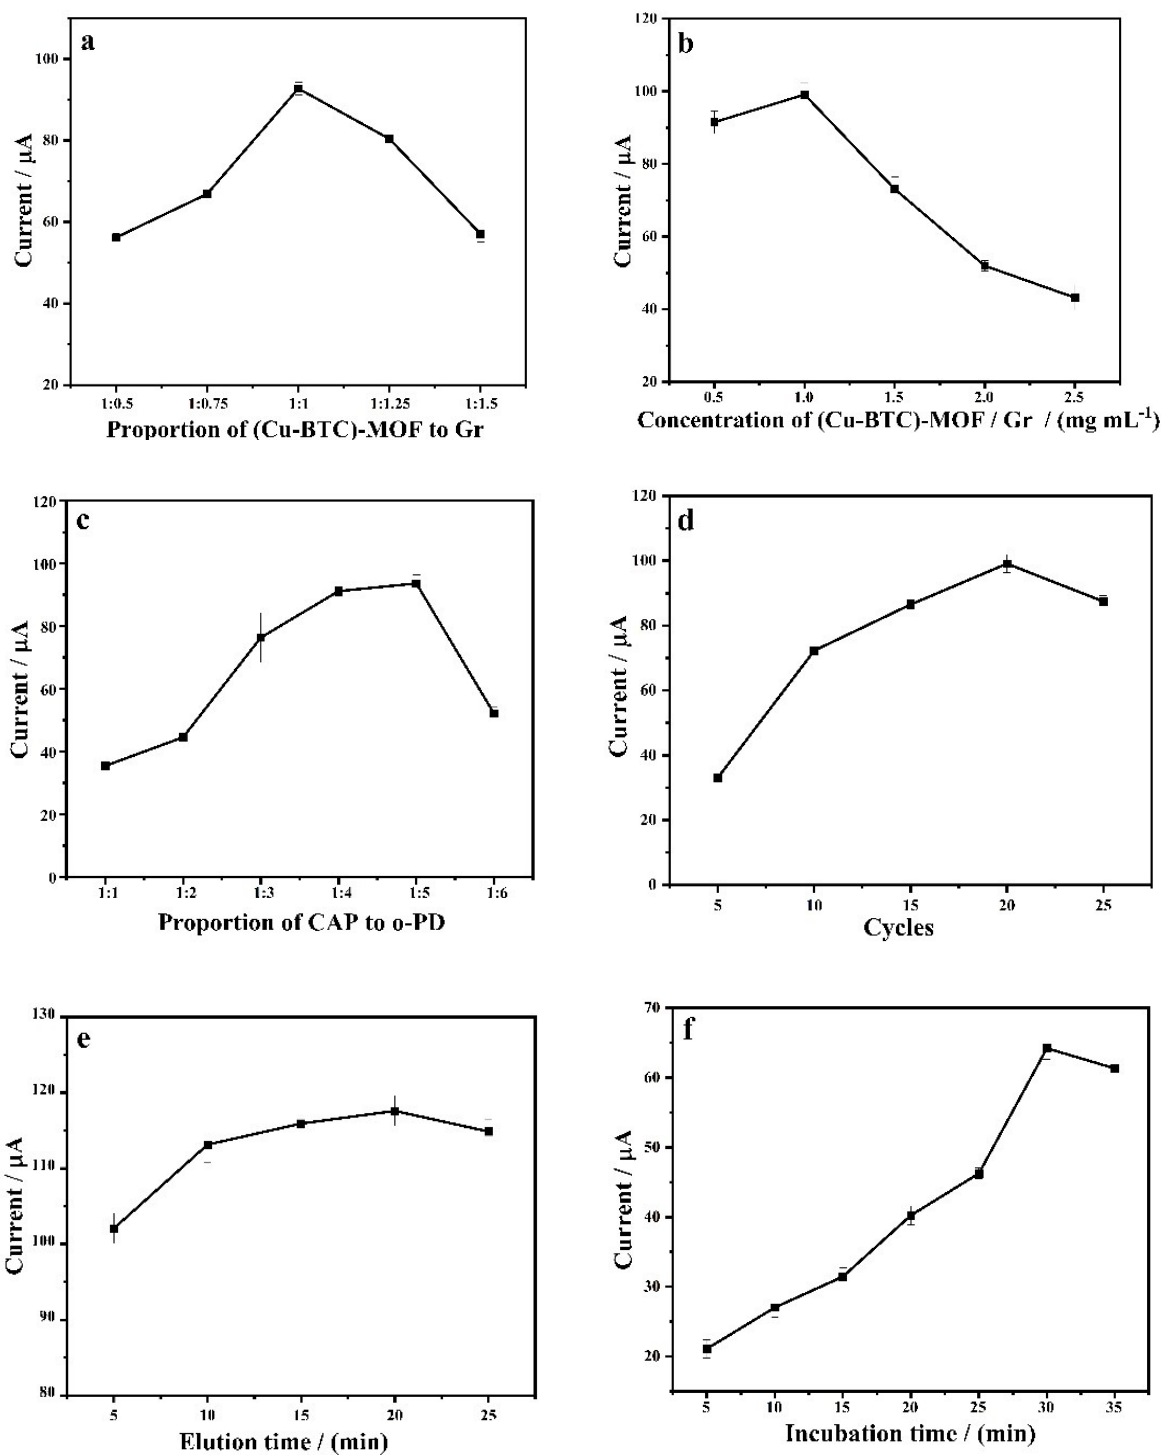

**Fig. S4** Effect of the constructed parameters on the performance of MIP/(Cu-BTC)-MOF/Gr/GCE sensor.

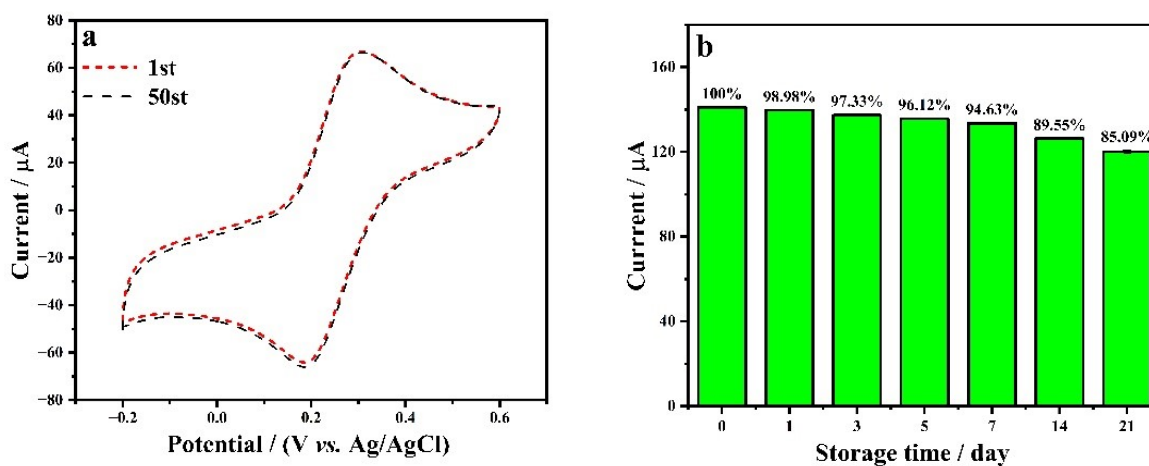

**Fig. S5** Stability of the MIP/(Cu-BTC)-MOF/Gr/GCE sensor: (a) stability, (b) Long-term stability.

Table S1 The CV peak current for different modified electrodes

| Electrode                   | $I/\mu\text{A}$ |
|-----------------------------|-----------------|
| GCE                         | 85.3            |
| (Cu-BTC)-MOF/GCE            | 42.4            |
| Gr/GCE                      | 216.0           |
| (Cu-BTC)-MOF/Gr/GCE         | 117.0           |
| MIP/Gr/GCE                  | 54.1            |
| MIP/(Cu-BTC)-MOF/GCE        | 36.0            |
| MIP/GCE                     | 23.8            |
| MIP-CAP/(Cu-BTC)-MOF/Gr/GCE | 31.6            |
| MIP/(Cu-BTC)-MOF/Gr/GCE     | 71.6            |
| NIP/(Cu-BTC)-MOF/Gr/GCE     | 18.2            |

Table S2 Calculated results of  $R_{ct}$  for different modified electrodes

| Electrodes                  | $R_{ct}/\Omega$ |
|-----------------------------|-----------------|
| GCE                         | 297.6           |
| (Cu-BTC)-MOF/GCE            | 1897            |
| Gr/GCE                      | 55.92           |
| (Cu-BTC)-MOF/Gr/GCE         | 274.5           |
| MIP/Gr/GCE                  | 1615            |
| MIP/(Cu-BTC)-MOF/GCE        | 3108            |
| MIP/GCE                     | 4008            |
| MIP-CAP/(Cu-BTC)-MOF/Gr/GCE | 3433            |
| MIP/(Cu-BTC)-MOF/Gr/GCE     | 908.3           |
| NIP/(Cu-BTC)-MOF/Gr/GCE     | 4552            |
